# Supplementary material for: Universal Tobacco Screening and Opt-Out Treatment Referral Strategy Among Patients Diagnosed With Cancer by Race and Ethnicity
Source: PubMed Central journal article supplement (PMC11036136; doi:10.1001/jamanetworkopen.2024.9525), 2024-04-22
Supplement: jamanetwopen-e249525-s002.pdf [file jamanetwopen-e249525-s002.pdf]

## **Data Sharing Statement**

Bates-Pappas. Universal Tobacco Screening and Opt-Out Treatment Referral Strategy Among Patients Diagnosed With Cancer by Race and Ethnicity. *JAMA Netw Open*. Published April 22, 2024. doi:10.1001/jamanetworkopen.2024.9525

### **Data**

**Data available:** No
